# Supplementary material for: Crown-substituted naphthalocyanines: synthesis and supramolecular control over aggregation and photophysical properties
Source: Royal Society of Chemistry journal article supplement (doi:10.1039/c8dt03661f), 2018-01-01
Supplement: c8dt03661f1.pdf [file c8dt03661f1.pdf]

## Supporting information

### Crown-substituted naphthalocyanines: synthesis and supramolecular control over aggregation and photophysical properties

Evgeniya A. Safonova,<sup>a</sup> Marina A. Polovkova,<sup>a</sup> Alexander G. Martynov\*,<sup>a</sup> Yulia G. Gorbunova\*<sup>a,b</sup> and Aslan Yu. Tsivadze<sup>a,b</sup>

<sup>a</sup>*A.N. Frumkin Institute of Physical Chemistry and Electrochemistry, Russian Academy of Sciences, 119071, Leninskii pr., 31, building 4, Moscow, Russia*

<sup>b</sup>*N.S. Kurnakov Institute of General and Inorganic Chemistry, Russian Academy of Sciences, 119991, Leninskii pr., 31, Moscow, Russia*

|                                                                                                                                                                   |   |
|-------------------------------------------------------------------------------------------------------------------------------------------------------------------|---|
| Fig. S1 HR ESI mass-spectrum of 1Mg .....                                                                                                                         | 2 |
| Fig. S2 HR ESI mass-spectrum of 1H <sub>2</sub> .....                                                                                                             | 2 |
| Fig. S3 HR ESI mass-spectrum of 1Zn .....                                                                                                                         | 2 |
| Fig. S4 <sup>1</sup> H NMR spectrum of 1Mg in DMSO- <i>d</i> <sub>6</sub> .....                                                                                   | 3 |
| Fig. S5 Dependence of UV-Vis spectra of 1Mg in CHCl <sub>3</sub> :MeOH (9:1) on temperature.....                                                                  | 3 |
| Fig. S6 Dependence of UV-Vis spectra of 1Zn in CHCl <sub>3</sub> :MeOH (9:1) on temperature (heating from 5°C to 60°C) .....                                      | 4 |
| Fig. S8 Interaction of 1Mg in CHCl <sub>3</sub> :MeOH (9:1) with 2 eq. KOAc in time .....                                                                         | 5 |
| Fig. S9 Interaction of 1Zn in CHCl <sub>3</sub> :MeOH (9:1) with 2 eq. KOAc in time .....                                                                         | 5 |
| Fig. S10 Interaction of 1H <sub>2</sub> in CHCl <sub>3</sub> :MeOH (9:1) with 2 eq. KOAc.....                                                                     | 6 |
| Fig. S11 Spectrophotometric titration of cofacial dimer (1Zn) <sub>2</sub> K <sub>4</sub> in CHCl <sub>3</sub> :MeOH (9:1) with [2.2.2]cryptand.....              | 6 |
| Fig. S12 Spectrophotometric titration of cofacial dimer (1H <sub>2</sub> ) <sub>2</sub> K <sub>4</sub> in CHCl <sub>3</sub> :MeOH (9:1) with [2.2.2]cryptand..... | 7 |
| Fig. S13 Changes in UV-Vis spectrum of dimer (1Mg) <sub>2</sub> K <sub>4</sub> in CHCl <sub>3</sub> -MeOH (9:1) upon irradiation of laser (λ=670 nm).....         | 7 |
| Fig. S14 Changes in UV-Vis spectrum of monomer 1Mg upon irradiation of laser (λ=670 nm) in CHCl <sub>3</sub> -MeOH (9:1) .....                                    | 8 |
| Fig. S15 Changes in UV-Vis spectrum of monomer 1Zn upon irradiation of laser (λ=670 nm) in CHCl <sub>3</sub> -MeOH (9:1) .....                                    | 8 |
| Fig. S16 Changes in UV-Vis spectrum of monomer 1H <sub>2</sub> upon irradiation of laser (λ=670 nm) in CHCl <sub>3</sub> -MeOH (9:1) .....                        | 9 |

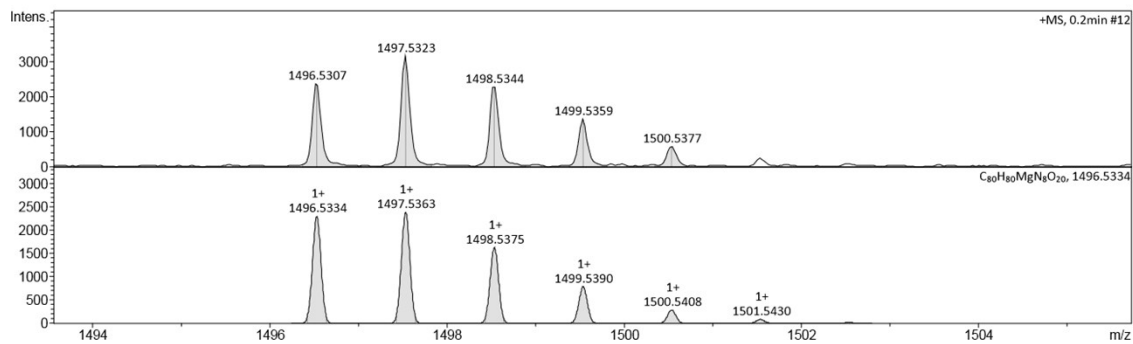

Fig. S1 HR ESI mass-spectrum of 1Mg

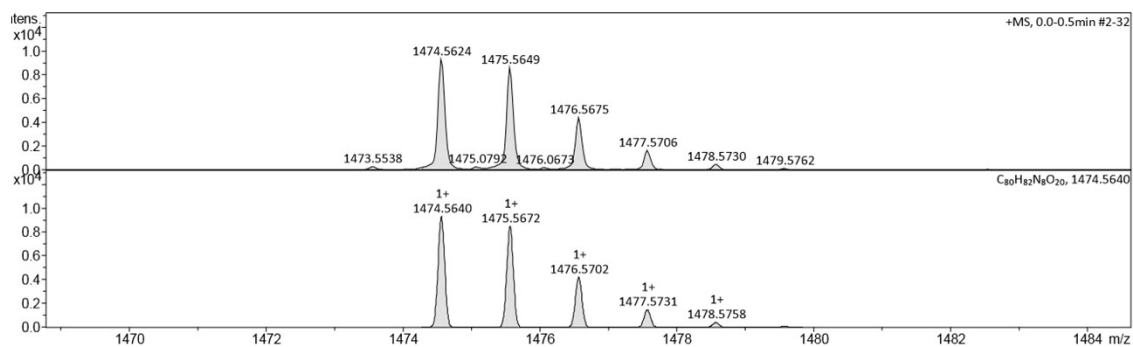

Fig. S2 HR ESI mass-spectrum of 1H<sub>2</sub>

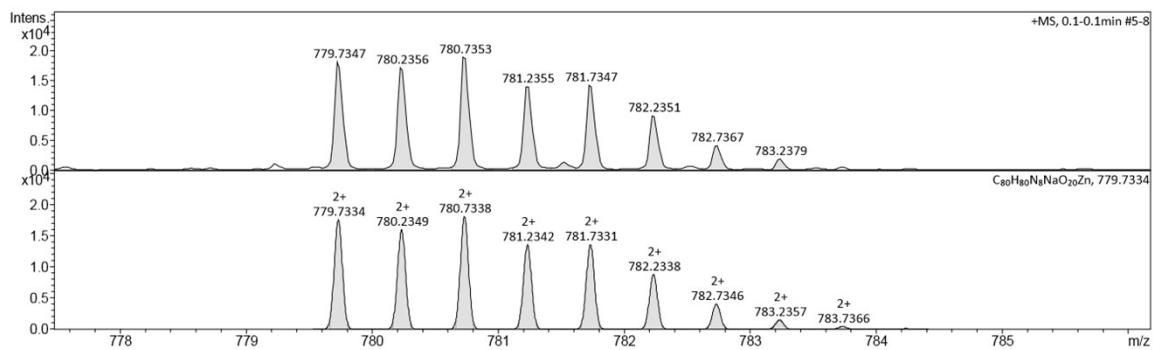

Fig. S3 HR ESI mass-spectrum of 1Zn

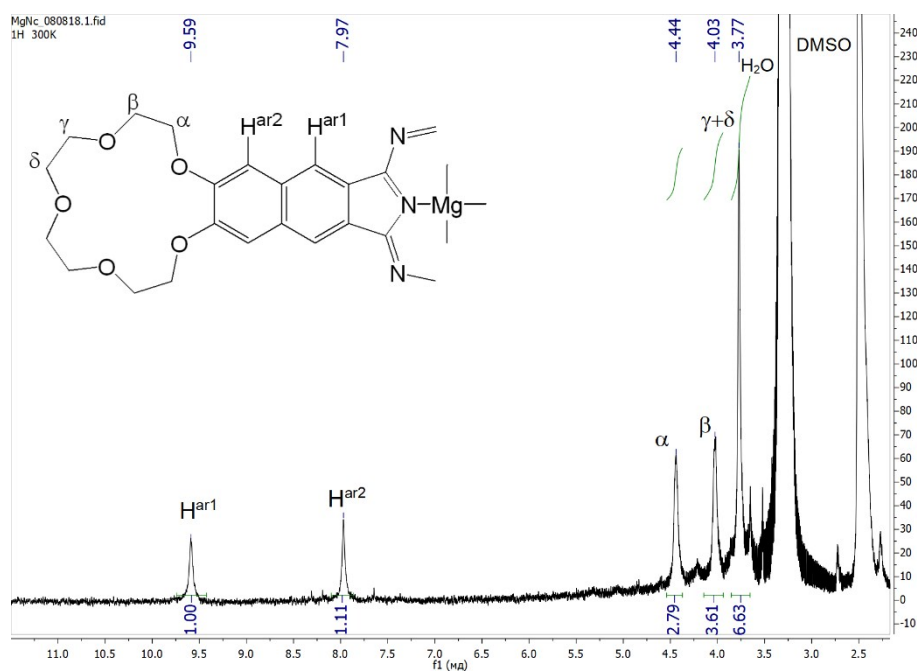

**Fig. S4** <sup>1</sup>H NMR spectrum of **1Mg** in DMSO-*d*<sub>6</sub>

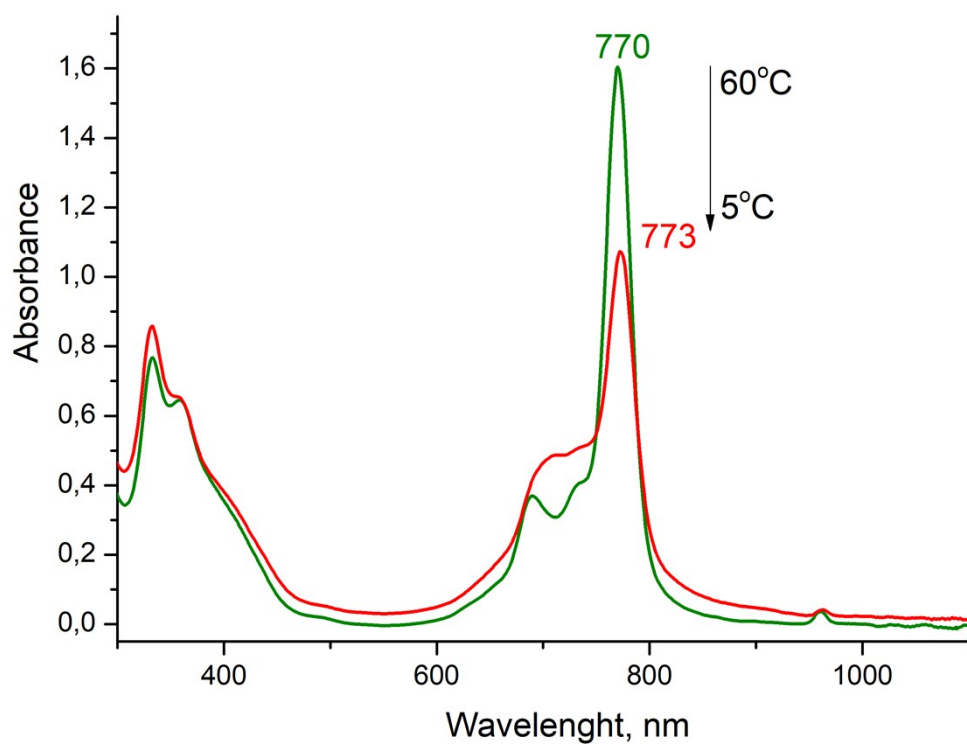

**Fig. S5** Dependence of UV-Vis spectra of **1Mg** in CHCl<sub>3</sub>:MeOH (9:1) on temperature. Starting solution of the monomeric form was obtained by heating of the aggregated complex in CHCl<sub>3</sub>:MeOH (9:1) to 65°C (see Fig 2 in the paper).

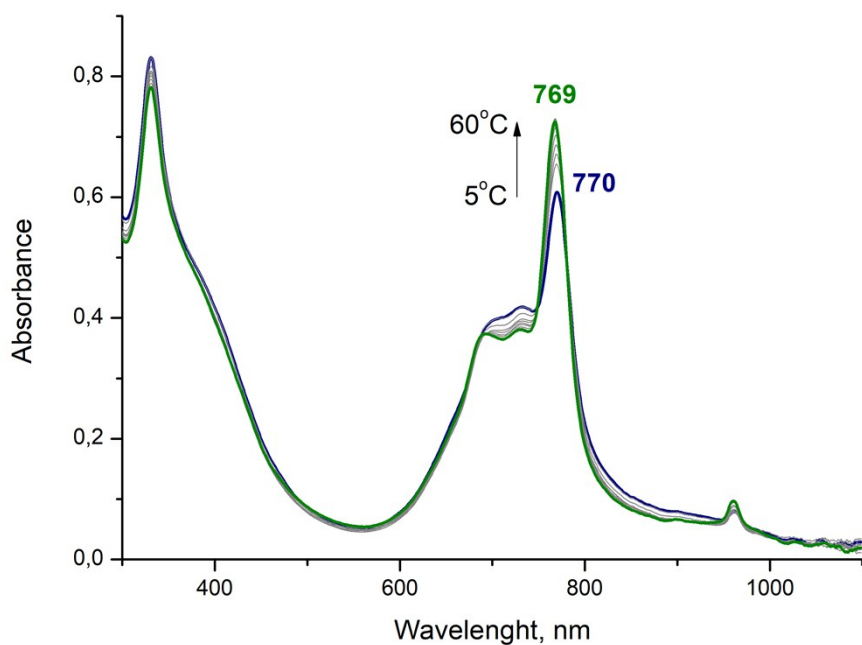

**Fig. S6** Dependence of UV-Vis spectra of **1Zn** in CHCl<sub>3</sub>:MeOH (9:1) on temperature (heating from 5°C to 60°C)

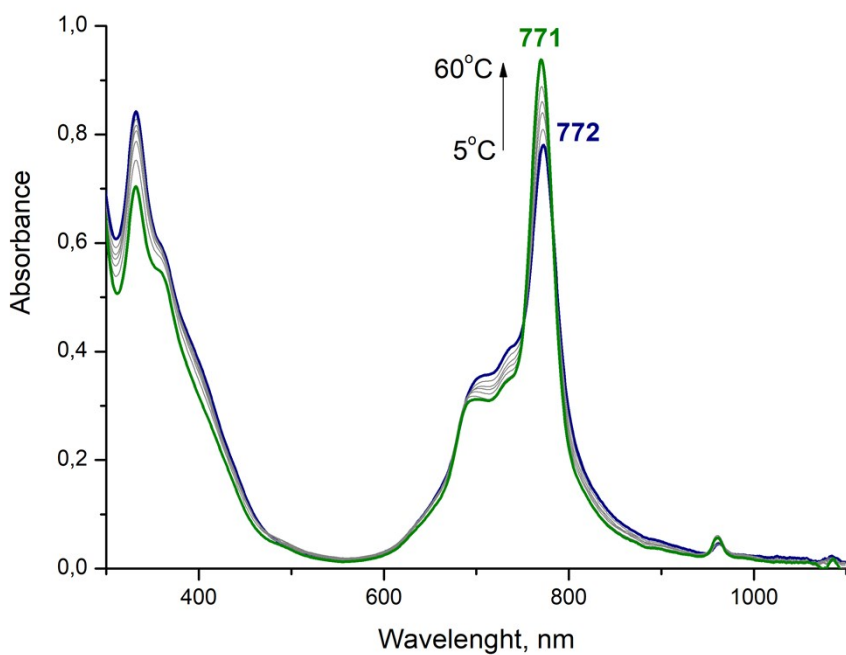

**Fig. S7** Dependence of UV-Vis spectra of **1H<sub>2</sub>** in CHCl<sub>3</sub>:MeOH (9:1) on temperature (heating from 5°C to 60°C)

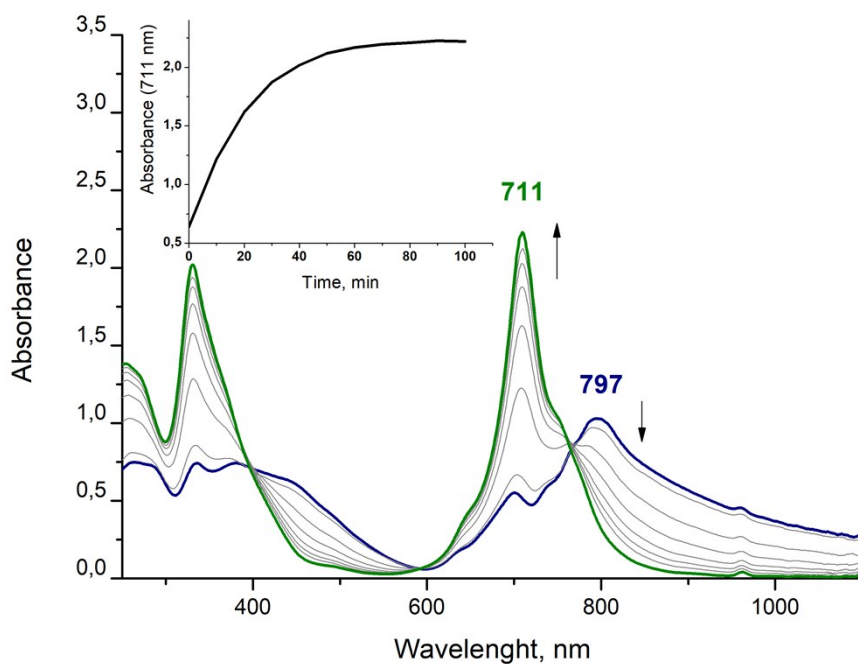

**Fig. S8** Interaction of **1Mg** in  $\text{CHCl}_3:\text{MeOH}$  (9:1) with 2 eq. KOAc in time

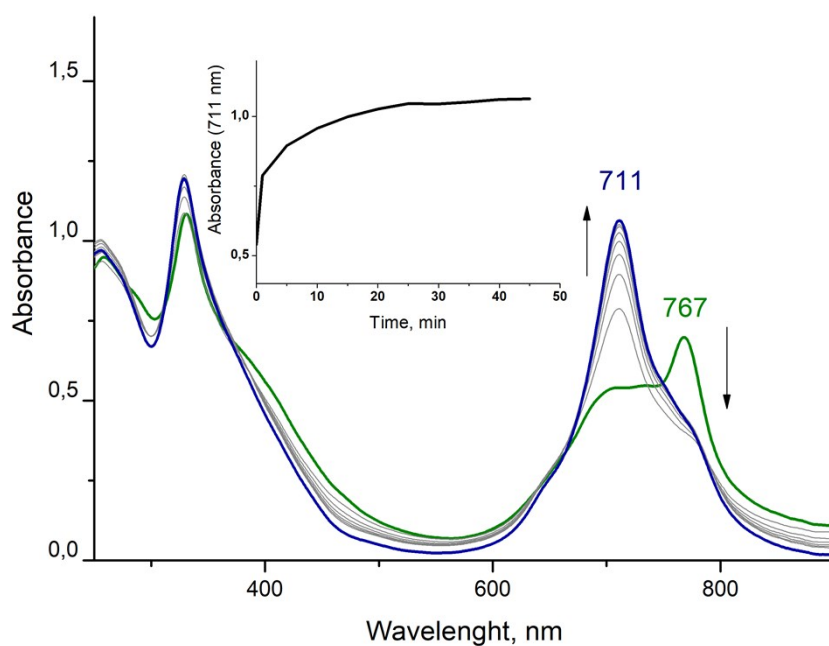

**Fig. S9** Interaction of **1Zn** in  $\text{CHCl}_3:\text{MeOH}$  (9:1) with 2 eq. KOAc in time

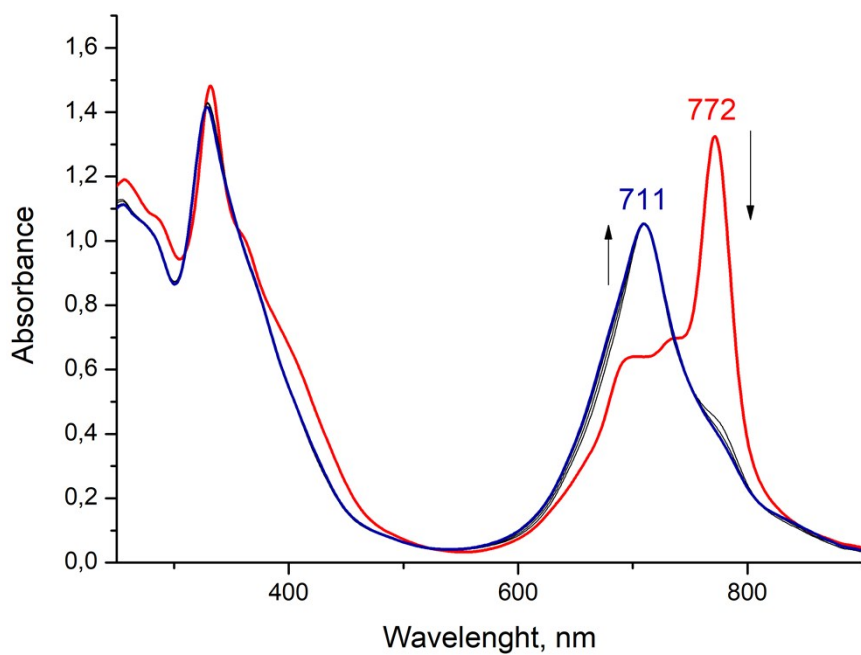

**Fig. S10** Interaction of **1H<sub>2</sub>** in CHCl<sub>3</sub>:MeOH (9:1) with 2 eq. KOAc

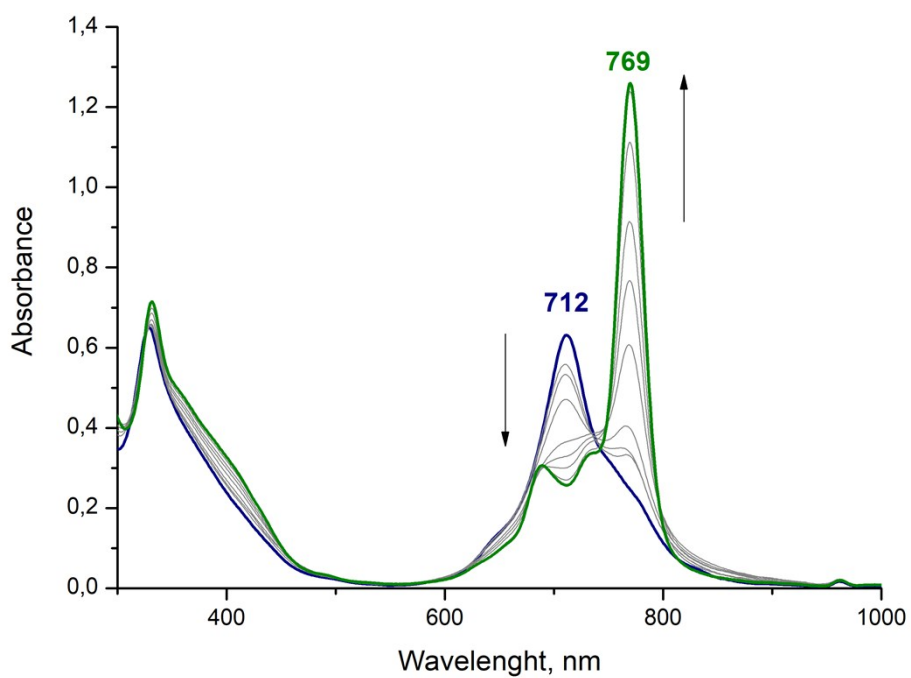

**Fig. S11** Spectrophotometric titration of cofacial dimer (**1Zn**)<sub>2</sub>K<sub>4</sub> in CHCl<sub>3</sub>:MeOH (9:1) with [2.2.2]cryptand

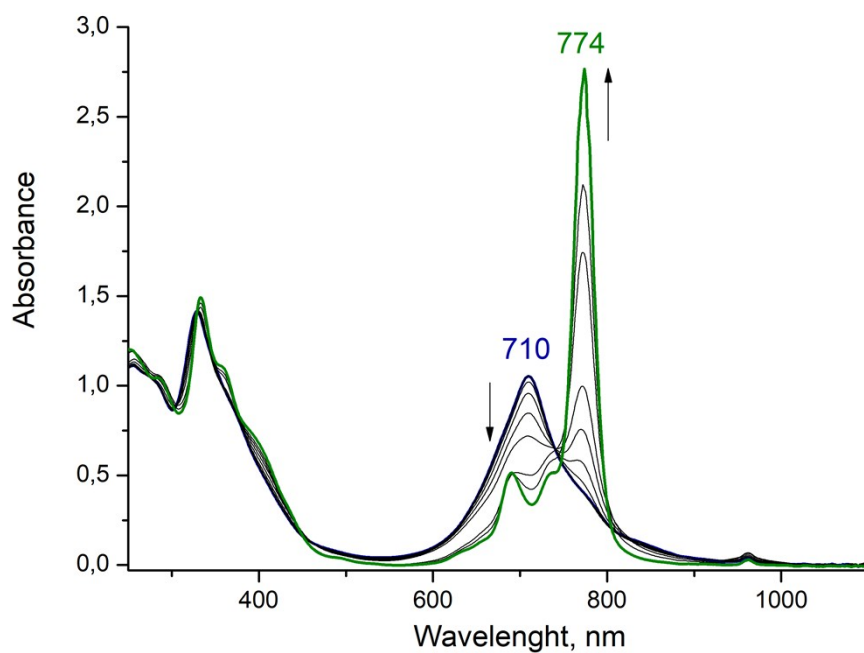

**Fig. S12** Spectrophotometric titration of cofacial dimer  $(\mathbf{1H}_2)_2\text{K}_4$  in  $\text{CHCl}_3:\text{MeOH}$  (9:1) with [2.2.2]cryptand

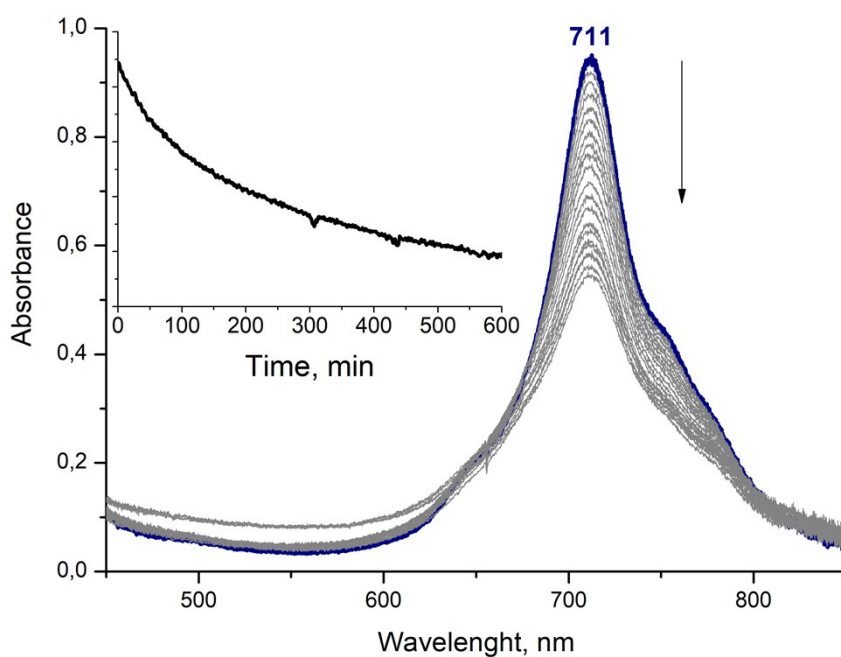

**Fig. S13** Changes in UV-Vis spectrum of dimer  $(\mathbf{1Mg})_2\text{K}_4$  in  $\text{CHCl}_3\text{-MeOH}$  (9:1) upon irradiation of laser ( $\lambda=670$  nm)

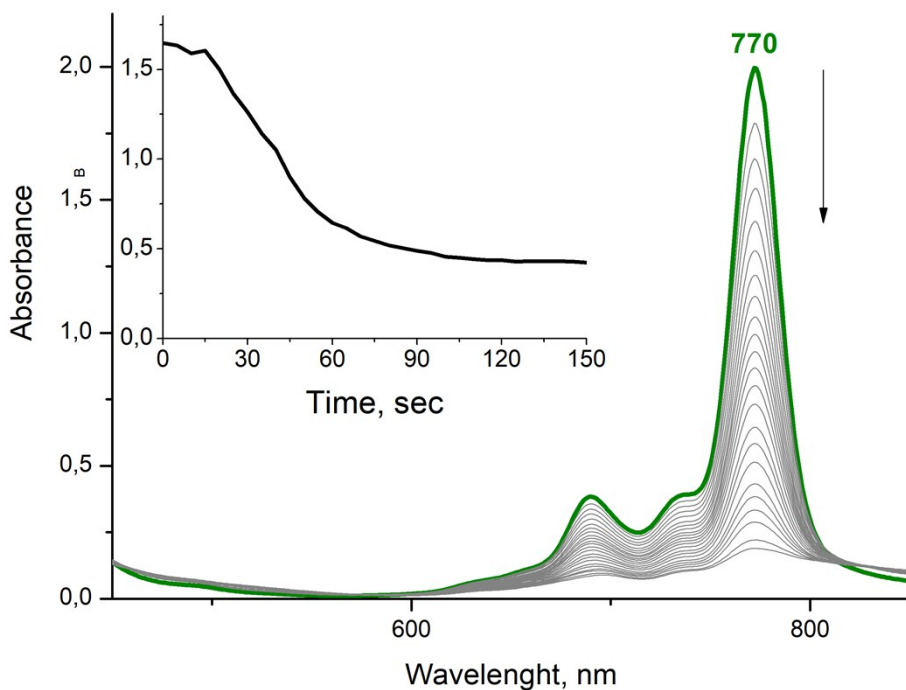

**Fig. S14** Changes in UV-Vis spectrum of monomer **1Mg** upon irradiation of laser ( $\lambda=670$  nm) in  $\text{CHCl}_3\text{-MeOH}$  (9:1)

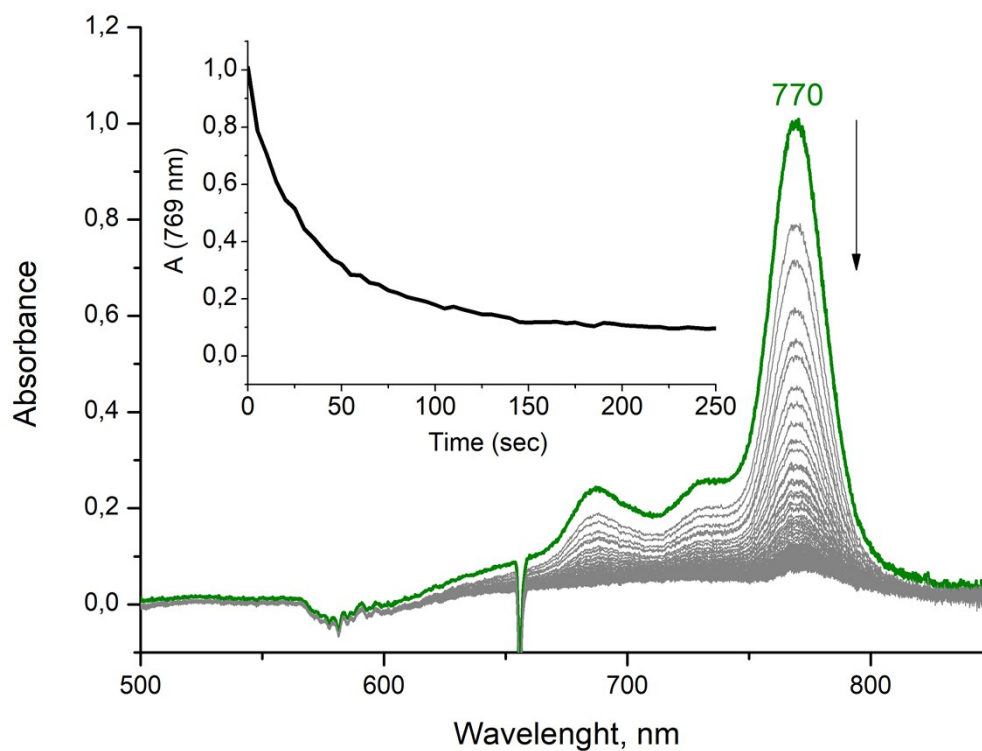

**Fig. S15** Changes in UV-Vis spectrum of monomer **1Zn** upon irradiation of laser ( $\lambda=670$  nm) in  $\text{CHCl}_3\text{-MeOH}$  (9:1)



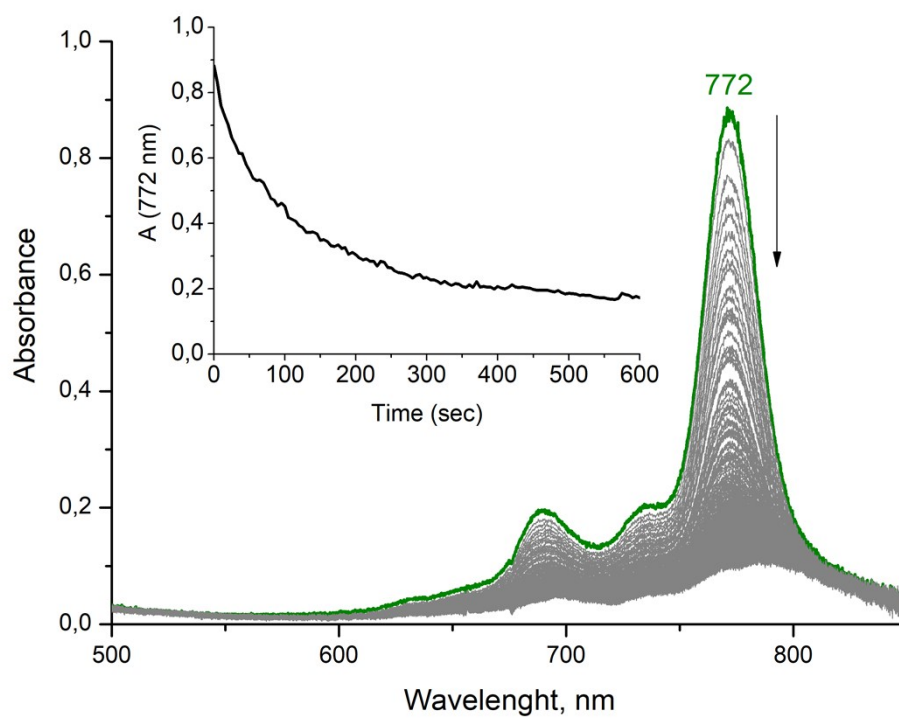

**Fig. S16** Changes in UV-Vis spectrum of monomer **1H<sub>2</sub>** upon irradiation of laser ( $\lambda=670$  nm) in CHCl<sub>3</sub>-MeOH (9:1)
